# Supplementary material for: Mapping the Conformation Space of Wildtype and Mutant H-Ras with a Memetic, Cellular, and Multiscale Evolutionary Algorithm
Source: PubMed Central journal article supplement (PMC4556523; doi:10.1371/journal.pcbi.1004470), 2015-09-01
Supplement: pcbi.1004470.s002.pdf [file pcbi.1004470.s002.pdf]

Table 1: List of PDB Ids of Crystallographic Structures.

| Nr. | PDB ID | Chain | Label | Nr. | PDB ID | Chain | Label      |
|-----|--------|-------|-------|-----|--------|-------|------------|
| 1   | 1lf5   | A     | GDP   | 44  | 6q21   | D     | GTP        |
| 2   | 1q21   | A     | GDP   | 45  | 721p   | A     | GTP        |
| 3   | 1xj0   | A     | GDP   | 46  | 821p   | A     | GTP        |
| 4   | 1zvf   | A     | GDP   | 47  | 1BKD   | R     | Validation |
| 5   | 2ce2   | X     | GDP   | 48  | 2CL6   | X     | Validation |
| 6   | 2q21   | A     | GDP   | 49  | 2QUZ   | A     | Validation |
| 7   | 4q21   | A     | GDP   | 50  | 2RGA   | A     | Validation |
| 8   | 121p   | A     | GTP   | 51  | 2RGB   | A     | Validation |
| 9   | 1agp   | A     | GTP   | 52  | 2RGC   | A     | Validation |
| 10  | 1ctq   | A     | GTP   | 53  | 2RGD   | A     | Validation |
| 11  | 1gnp   | A     | GTP   | 54  | 2UZI   | R     | Validation |
| 12  | 1gnq   | A     | GTP   | 55  | 2VH5   | R     | Validation |
| 13  | 1gnr   | A     | GTP   | 56  | 3DDC   | A     | Validation |
| 14  | 1he8   | B     | GTP   | 57  | 3I3S   | R     | Validation |
| 15  | 1jah   | A     | GTP   | 58  | 3K8Y   | A     | Validation |
| 16  | 1jai   | A     | GTP   | 59  | 3KKN   | A     | Validation |
| 17  | 1k8r   | A     | GTP   | 60  | 3L8Y   | A     | Validation |
| 18  | 1lf0   | A     | GTP   | 61  | 3L8Z   | A     | Validation |
| 19  | 1lfd   | B     | GTP   | 62  | 3LBH   | A     | Validation |
| 20  | 1lfd   | D     | GTP   | 63  | 3LBI   | A     | Validation |
| 21  | 1nvu   | Q     | GTP   | 64  | 3LBN   | A     | Validation |
| 22  | 1nvv   | Q     | GTP   | 65  | 3OIU   | A     | Validation |
| 23  | 1nvw   | Q     | GTP   | 66  | 3OIW   | A     | Validation |
| 24  | 1nvx   | Q     | GTP   | 67  | 3RRY   | A     | Validation |
| 25  | 1p2s   | A     | GTP   | 68  | 3RRZ   | A     | Validation |
| 26  | 1p2v   | A     | GTP   | 69  | 3RS0   | A     | Validation |
| 27  | 1qra   | A     | GTP   | 70  | 3RS2   | A     | Validation |
| 28  | 1wq1   | R     | GTP   | 71  | 3RS3   | A     | Validation |
| 29  | 1xd2   | A     | GTP   | 72  | 3RS5   | A     | Validation |
| 30  | 221p   | A     | GTP   | 73  | 3RSO   | A     | Validation |
| 31  | 2c5l   | A     | GTP   | 74  | 3TGP   | A     | Validation |
| 32  | 2c5l   | B     | GTP   | 75  | 4DLR   | A     | Validation |
| 33  | 2cl0   | X     | GTP   | 76  | 4DLS   | A     | Validation |
| 34  | 2cl7   | X     | GTP   | 77  | 4DLT   | A     | Validation |
| 35  | 2clc   | X     | GTP   | 78  | 4DLU   | A     | Validation |
| 36  | 2evw   | X     | GTP   | 79  | 4DLV   | A     | Validation |
| 37  | 421p   | A     | GTP   | 80  | 4DLW   | A     | Validation |
| 38  | 521p   | A     | GTP   | 81  | 4DLX   | A     | Validation |
| 39  | 5p21   | A     | GTP   | 82  | 4DLY   | A     | Validation |
| 40  | 621p   | A     | GTP   | 83  | 4DLZ   | A     | Validation |
| 41  | 6q21   | A     | GTP   | 84  | 4EFL   | A     | Validation |
| 42  | 6q21   | B     | GTP   | 85  | 4EFM   | A     | Validation |
| 43  | 6q21   | C     | GTP   | 86  | 4EFN   | A     | Validation |
