# Supplementary material for: Mapping the Conformation Space of Wildtype and Mutant H-Ras with a Memetic, Cellular, and Multiscale Evolutionary Algorithm
Source: PubMed Central journal article supplement (PMC4556523; doi:10.1371/journal.pcbi.1004470), 2015-09-01
Supplement: pcbi.1004470.s003.pdf [file pcbi.1004470.s003.pdf]

Table 1: **Details on Crystallographic Structures Deemed Outliers.**

| <b>PDB ID</b>          | <b>Title</b>                                                                                                              | <b>Authors</b>   |
|------------------------|---------------------------------------------------------------------------------------------------------------------------|------------------|
| 4EFM,<br>4EFL,<br>4EFN | Crystal structures of the state1 conformations of the GTP-bound H-Ras protein and its oncogenic G12V and Q61L mutants [?] | Kataoka lab 2012 |
| 3KKN                   | Structural basis for conformational dynamics of GTP-bound Ras protein [?]                                                 | Kataoka lab 2010 |
| 1BKD                   | The structural basis of the activation of Ras by Sos [?]                                                                  | Kuriyan lab 1998 |
